# Supplementary material for: Live imaging and conditional disruption of native PCP activity using endogenously tagged zebrafish sfGFP-Vangl2
Source: PubMed Central journal article supplement (PMC9508082; doi:10.1038/s41467-022-33322-9), 2022-09-23
Supplement: 41467_2022_33322_MOESM3_ESM.pdf [file 41467_2022_33322_MOESM3_ESM.pdf]

### **Description of Additional Supplementary Files**

File Name: Supplementary Movie 1

Description: Vangl2 enrichment on anterior membranes is dynamic over time

File Name: Supplementary Movie 2

Description: Vangl2 enrichment on the anterior membrane does not colocalize with filamentous actin

File Name: Supplementary Movie 3

Description: Vangl2 localizes to anterior apical membranes and to basal membrane extensions in dividing cells

File Name: Supplementary Movie 4

Description: Vangl2 anterior polarization is lost during cell division
