# Supplementary material for: Live imaging and conditional disruption of native PCP activity using endogenously tagged zebrafish sfGFP-Vangl2
Source: PubMed Central journal article supplement (PMC9508082; doi:10.1038/s41467-022-33322-9), 2022-09-23
Supplement: 41467_2022_33322_MOESM8_ESM.pdf [file 41467_2022_33322_MOESM8_ESM.pdf]

## Reporting Summary

Nature Portfolio wishes to improve the reproducibility of the work that we publish. This form provides structure for consistency and transparency in reporting. For further information on Nature Portfolio policies, see our [Editorial Policies](#) and the [Editorial Policy Checklist](#).

### Statistics

For all statistical analyses, confirm that the following items are present in the figure legend, table legend, main text, or Methods section.

n/a Confirmed

- The exact sample size ( $n$ ) for each experimental group/condition, given as a discrete number and unit of measurement
- A statement on whether measurements were taken from distinct samples or whether the same sample was measured repeatedly
- The statistical test(s) used AND whether they are one- or two-sided  
*Only common tests should be described solely by name; describe more complex techniques in the Methods section.*
- A description of all covariates tested
- A description of any assumptions or corrections, such as tests of normality and adjustment for multiple comparisons
- A full description of the statistical parameters including central tendency (e.g. means) or other basic estimates (e.g. regression coefficient) AND variation (e.g. standard deviation) or associated estimates of uncertainty (e.g. confidence intervals)
- For null hypothesis testing, the test statistic (e.g.  $F$ ,  $t$ ,  $r$ ) with confidence intervals, effect sizes, degrees of freedom and  $P$  value noted  
*Give  $P$  values as exact values whenever suitable.*
- For Bayesian analysis, information on the choice of priors and Markov chain Monte Carlo settings
- For hierarchical and complex designs, identification of the appropriate level for tests and full reporting of outcomes
- Estimates of effect sizes (e.g. Cohen's  $d$ , Pearson's  $r$ ), indicating how they were calculated

*Our web collection on [statistics for biologists](#) contains articles on many of the points above.*

### Software and code

Policy information about [availability of computer code](#)

Data collection The following software was used for image acquisition: Leica LAS X, Leica LAS X Lightning, ChemiDoc MP (Bio-Rad), CTVox SEM software (Bruker)

Data analysis FIJI version 1.53f51 (ImageJ) and Imaris version 9.9.1 (Bitplane) were used for image analysis and preparing manuscript figures, Imaris Viewer version 9.9.1 (Bitplane), Photoshop release 23.4.2 (Adobe) and Illustrator release 26.4.1 (Adobe) were used to prepare figures, Prism 9 version 9.3.1 (GraphPad) was used for statistical testing.

For manuscripts utilizing custom algorithms or software that are central to the research but not yet described in published literature, software must be made available to editors and reviewers. We strongly encourage code deposition in a community repository (e.g. GitHub). See the Nature Portfolio [guidelines for submitting code & software](#) for further information.

### Data

Policy information about [availability of data](#)

All manuscripts must include a [data availability statement](#). This statement should provide the following information, where applicable:

- Accession codes, unique identifiers, or web links for publicly available datasets
- A description of any restrictions on data availability
- For clinical datasets or third party data, please ensure that the statement adheres to our [policy](#)

All quantified data is available as a supplemental Source Data file. Raw imaging files are available upon request due to large size.

## Field-specific reporting

Please select the one below that is the best fit for your research. If you are not sure, read the appropriate sections before making your selection.

Life sciences       Behavioural & social sciences       Ecological, evolutionary & environmental sciences

For a reference copy of the document with all sections, see [nature.com/documents/nr-reporting-summary-flat.pdf](https://nature.com/documents/nr-reporting-summary-flat.pdf)

## Life sciences study design

All studies must disclose on these points even when the disclosure is negative.

|                 |                                                                                                                                                                                                                                                          |
|-----------------|----------------------------------------------------------------------------------------------------------------------------------------------------------------------------------------------------------------------------------------------------------|
| Sample size     | No sample size calculations were performed. Sample size was limited by the number of embryonic and cell samples available and based partially on our previous experience.                                                                                |
| Data exclusions | No data were excluded from analysis.                                                                                                                                                                                                                     |
| Replication     | Biological replicates were conducted and they reproduced all findings. Number of replicates is indicated in the figure legends.                                                                                                                          |
| Randomization   | Embryos were randomly allocated to control and zGrad mRNA injected groups by randomly dividing and injecting half of a clutch with mRNA at 1 cell stage. In other experiments samples were not randomized as we used genetic mutant and control animals. |
| Blinding        | In embryonic length quantifications, samples that required genotyping were measured prior to genotyping. In other experiments blinding was not possible as obvious phenotypes or fluorescent marker expression were visible.                             |

## Reporting for specific materials, systems and methods

We require information from authors about some types of materials, experimental systems and methods used in many studies. Here, indicate whether each material, system or method listed is relevant to your study. If you are not sure if a list item applies to your research, read the appropriate section before selecting a response.

### Materials & experimental systems

### Methods

| n/a                                 | Included in the study                                           | n/a                                 | Included in the study                           |
|-------------------------------------|-----------------------------------------------------------------|-------------------------------------|-------------------------------------------------|
| <input type="checkbox"/>            | <input checked="" type="checkbox"/> Antibodies                  | <input checked="" type="checkbox"/> | <input type="checkbox"/> ChIP-seq               |
| <input checked="" type="checkbox"/> | <input type="checkbox"/> Eukaryotic cell lines                  | <input checked="" type="checkbox"/> | <input type="checkbox"/> Flow cytometry         |
| <input checked="" type="checkbox"/> | <input type="checkbox"/> Palaeontology and archaeology          | <input checked="" type="checkbox"/> | <input type="checkbox"/> MRI-based neuroimaging |
| <input type="checkbox"/>            | <input checked="" type="checkbox"/> Animals and other organisms |                                     |                                                 |
| <input checked="" type="checkbox"/> | <input type="checkbox"/> Human research participants            |                                     |                                                 |
| <input checked="" type="checkbox"/> | <input type="checkbox"/> Clinical data                          |                                     |                                                 |
| <input checked="" type="checkbox"/> | <input type="checkbox"/> Dual use research of concern           |                                     |                                                 |

## Antibodies

|                 |                                                                                                                                                                                                                                                                                                                                                                                                                                                                                                                                                                                                                                                                                                                                                                                                                                                                                                                             |
|-----------------|-----------------------------------------------------------------------------------------------------------------------------------------------------------------------------------------------------------------------------------------------------------------------------------------------------------------------------------------------------------------------------------------------------------------------------------------------------------------------------------------------------------------------------------------------------------------------------------------------------------------------------------------------------------------------------------------------------------------------------------------------------------------------------------------------------------------------------------------------------------------------------------------------------------------------------|
| Antibodies used | Anti-LC3A, 1:100, rabbit polyclonal, Novus Biologicals #NB100-2331SS, lot AM; anti-Reissner substance, 1:500, rabbit polyclonal, non-commercial, doi:10.1016/j.cub.2020.04.020; anti-polyglutamylation modification, 1:500, mouse monoclonal, clone GT335, Adipogen Lifesciences #AG-20B-0020-C100, lot A27791601; anti-GFP, 1:2000, rabbit polyclonal, ThermoFisher Scientific #A11122, lot 51527A; anti-beta-actin, 1:500, rabbit polyclonal, Cell Signaling Technology #4967, lot 12; goat anti-rabbit HRP, 1:15000, polyclonal, Abcam #6721, lot GR3357864-9; Goat anti-Rabbit IgG (H+L) Alexa Fluor Plus 594, 1:1000, polyclonal, ThermoFisher Scientific #A32740, lot UG288488; goat anti-Rabbit IgG (H+L) Alexa Fluor Plus 488, 1:1000, polyclonal, ThermoFisher Scientific #A32731, lot UI295697; Goat anti-Mouse IgG (H+L) Alexa Fluor Plus 647, 1:1000, polyclonal, ThermoFisher Scientific #A32728, lot WK331591 |
| Validation      | LC3a antibody has been previously used in zebrafish, doi:10.1371/journal.pgen.1003303; anti-Reissner substance has been previously used in zebrafish doi:10.1016/j.cub.2020.04.020; anti-polyglutamylation modification has been validated for immunofluorescent by the manufacturer; anti-GFP has been verified for Western Blot by manufacturer and our GFP degradation experiments further verify specificity; anti-beta-actin has been verified for Western Blot and reactivity in zebrafish by the manufacturer, the goat anti-rabbit HRP and Alexa Fluor secondary antibodies have been validated by the manufacturer                                                                                                                                                                                                                                                                                                 |

## Animals and other organisms

Policy information about [studies involving animals](#); [ARRIVE guidelines](#) recommended for reporting animal research

|                    |                                                                                                                                                                                                                                                                                                                         |
|--------------------|-------------------------------------------------------------------------------------------------------------------------------------------------------------------------------------------------------------------------------------------------------------------------------------------------------------------------|
| Laboratory animals | Wild-type TU (Tübingen), vangl2 mutant tritk50f and trim209 (Jessen et al. 2002) and transgenic Tg(foxy1a::iCre) (Van Gennip et al. 2018) were used in addition to the lines generated in this study. Reproductive age (2-18 months) female and male zebrafish were used to obtain embryonic samples used in the study. |
|--------------------|-------------------------------------------------------------------------------------------------------------------------------------------------------------------------------------------------------------------------------------------------------------------------------------------------------------------------|

Wild animals

No wild animals were used.

Field-collected samples

No field-collected samples were used.

Ethics oversight

Zebrafish husbandry and experimental protocols were approved by the Hospital for Sick Children's Animal Care Committee, and all protocols were performed in accordance with Canadian Council on Animal Care guidelines.

Note that full information on the approval of the study protocol must also be provided in the manuscript.
